# Supplementary material
Source: publisher figshare collection journal article supplement (https://tandf.figshare.com/ndownloader/files/16868786)
Supplement: Supplementary file 1 [file 16868786]

Supplementary materials







Fig.S1 XPS survey spectra of as-synthesized ZnO (a) and Cu-doped ZnO (b)







Fig.S2 XPS Zn 2p spectra of as-synthesized ZnO (a) and Cu-doped ZnO (b)
